# Supplementary material for: Homo-and heterodinuclear complexes of the tris(catecholamide) derivative of a tetraazamacrocycle with Fe3+, Cu2+and Zn2+metal ions
Source: Royal Society of Chemistry journal article supplement (doi:10.1039/b712916e), 2007-11-12
Supplement: b712916e.pdf [file b712916e.pdf]

## Electronic Supplementary Information

### **Homo- and heterodinuclear complexes of the tris(catecholamide) derivative of a tetraazamacrocyclic with Fe<sup>3+</sup>, Cu<sup>2+</sup> and Zn<sup>2+</sup> metal ions**

Krassimira P. Guerra,<sup>a</sup> and Rita Delgado<sup>a,b\*</sup>

<sup>a</sup> Instituto de Tecnologia Química e Biológica, UNL, Apartado 127, 2781-901 Oeiras, Portugal, <sup>b</sup> Instituto Superior Técnico, Av. Rovisco Pais, 1049-001 Lisboa, Portugal

Correspondence to: Rita Delgado

Instituto de Tecnologia Química e Biológica, UNL

Apartado 127

2781-901 Oeiras

Portugal

email: [delgado@itqb.unl.pt](mailto:delgado@itqb.unl.pt)

Fax n°. 351-214 41 12 77

Tel. 351-214 46 97 37 / 8

## Contents

**Table S1.** Spectroscopic UV-vis data for the solutions of 1:1 and 2:1  $\text{Cu}^{2+}$  ion to  $\text{H}_6\text{L}^1$  ratios at different pH values. ( $I = 0.10 \text{ mol dm}^{-3} \text{ KNO}_3$ ,  $T = 298 \text{ K}$ ).

**Table S2.** Spectroscopic UV-vis data for  $\text{Fe}^{3+}/\text{H}_6\text{L}^1$  1:1 ratio solutions at different pH regions ( $I = 0.10 \text{ mol dm}^{-3} \text{ KNO}_3$ ,  $T = 298 \text{ K}$ ).

**Table S3.** Spectroscopic UV-vis data of  $\text{Cu}^{2+}/\text{Fe}^{3+}/\text{H}_6\text{L}^1$  1:1:1 ratio solutions at different pH ( $I = 0.1 \text{ mol dm}^{-3}$ ,  $\text{KNO}_3$ ,  $T = 298 \text{ K}$ )

## Figure captions

**Fig. S1.** Species distribution curves calculated for the  $\text{Cu}^{2+}/\text{H}_6\text{L}^1$  system in aqueous solution.  $C_{\text{Cu}} = 2 \times C_{\text{L}} = 2.0 \times 10^{-3} \text{ mol dm}^{-3}$ .  $L = L^1$ .

**Fig. S2.** Species distribution curves calculated for the  $\text{Cu}^{2+}/\text{H}_6\text{L}^1$  system in aqueous solution.  $C_{\text{Cu}} = C_{\text{L}} = 1.0 \times 10^{-3} \text{ mol dm}^{-3}$ .  $L = L^1$ .

**Fig. S3.** X-band EPR signal of the  $\text{Fe}^{3+}/\text{H}_6\text{L}^1$  1:1 ratio solution at pH 10.2, recorded in water/DMSO (1:1 v/v), at 4.7 K. Microwave power of 2.35 mW, modulation amplitude of 1 mT and frequency of 9.64 GHz.

**Table S1.** Spectroscopic UV-vis data for the solutions of 1:1 and 2:1 Cu<sup>2+</sup> ion to H<sub>6</sub>L<sup>1</sup> ratios at different pH values. (*I* = 0.1 mol dm<sup>-3</sup> KNO<sub>3</sub>, *T* = 298 K).

| pH, ratio, colour          | UV-vis                                                                                                                                                                                      |
|----------------------------|---------------------------------------------------------------------------------------------------------------------------------------------------------------------------------------------|
|                            | $\lambda_{max}/nm$ ( $\epsilon_{molar}/dm^3 mol^{-1} cm^{-1}$ )                                                                                                                             |
| 5.4, 1:1, greenish blue    | 250 (9.8×10 <sup>3</sup> ), 316 (5.9×10 <sup>3</sup> ), 326 (sh., 5.7×10 <sup>3</sup> ), 340 (sh., 4.0×10 <sup>3</sup> ), 430 (sh., 268), 550 (sh., 142), 626 (125), 740 (sh., 78)          |
| 7.1, (1:1) greenish yellow | 250 (sh., 1.25×10 <sup>4</sup> ), 316 (7.4×10 <sup>3</sup> ), 326 (sh., 7.3×10 <sup>3</sup> ), 340 (sh., 5.5×10 <sup>3</sup> ), 430 (sh., 531), 550 (sh., 275), 626 (224), 740 (sh., 151)   |
| 10.0, 1:1, greenish yellow | 250 sh., 316, 326 sh., 340 sh., 430 sh., 550 sh., 626, 740 sh.                                                                                                                              |
| 9.1, 2:1, yellow           | 250 (sh., 1.77×10 <sup>4</sup> ), 316 (12.1×10 <sup>3</sup> ), 326 (sh., 11.5×10 <sup>3</sup> ), 340 (sh., 8.3×10 <sup>3</sup> ), 430 (sh., 479), 550 (sh., 255), 626 (234), 740 (sh., 160) |

**Table S2.** Spectroscopic UV-Vis data for Fe<sup>3+</sup>/H<sub>6</sub>L<sup>1</sup> 1:1 ratio solutions at different pH regions ( $I = 0.10 \text{ mol dm}^{-3} \text{ KNO}_3$ ,  $T = 298 \text{ K}$ ).

| pH, colour        | UV-vis $\lambda_{max}/\text{nm}(\epsilon_{molar}/\text{dm}^3 \text{ mol}^{-1} \text{ cm}^{-1})$                                                                                              |
|-------------------|----------------------------------------------------------------------------------------------------------------------------------------------------------------------------------------------|
| 5.0, light purple | 250 (sh., $1.6 \times 10^4$ ), 316 (sh., $8.6 \times 10^3$ ), 330 (sh., $7.3 \times 10^3$ ), 410 (sh., $3.1 \times 10^3$ ), 520 ( $2.3 \times 10^3$ ), 750 (sh., 846)                        |
| 6.9, purple       | 250 (sh., $23.4 \times 10^3$ ), 316 ( $13.5 \times 10^3$ ), 330 (sh., $10.3 \times 10^3$ ), 410 (sh., $3.4 \times 10^3$ ), 520 ( $2.5 \times 10^3$ ), 750 (sh., 584)                         |
| 11.4, red         | 250 ( $3.0 \times 10^4$ ), 316 ( $2.5 \times 10^4$ ), 326 (sh., $2.1 \times 10^4$ ), 330 (sh., $2.0 \times 10^4$ ), 410 (sh., $5.0 \times 10^3$ ), 474 ( $4.8 \times 10^3$ ), 750 (sh., 947) |

**Table S3.** Spectroscopic UV-vis data of Cu<sup>2+</sup>/Fe<sup>3+</sup>/H<sub>6</sub>L<sup>1</sup> 1:1:1 ratio solutions at different pH (*I* = 0.1 mol dm<sup>-3</sup>, KNO<sub>3</sub>, *T* = 298 K)

| pH   | colour          | UV-vis                                                                                                                                                                                                                              |
|------|-----------------|-------------------------------------------------------------------------------------------------------------------------------------------------------------------------------------------------------------------------------------|
|      |                 | $\lambda_{\max}/\text{nm}$ ( $\epsilon_{\text{molar}}/\text{dm}^3 \text{ mol}^{-1} \text{ cm}^{-1}$ )                                                                                                                               |
| 7.0  | red purple      | 250 ( $1.4 \times 10^4$ ), 294 (sh., $1.1 \times 10^4$ ), 316 (sh., $8.9 \times 10^3$ ), 326 (sh., $8.1 \times 10^3$ ), 340 (sh., $6.1 \times 10^3$ ), 406 (sh., $2.7 \times 10^3$ ), 622 (sh., $1.5 \times 10^3$ ), 740 (sh., 930) |
| 10.0 | dark red purple | 250 ( $1.8 \times 10^4$ ), 316 ( $1.7 \times 10^4$ ), 326 (sh., $1.3 \times 10^4$ ), 340 (sh., $8.4 \times 10^3$ ), 370 (sh., $2.7 \times 10^3$ ), 454 ( $2.45 \times 10^3$ ), 740 (sh., 725)                                       |

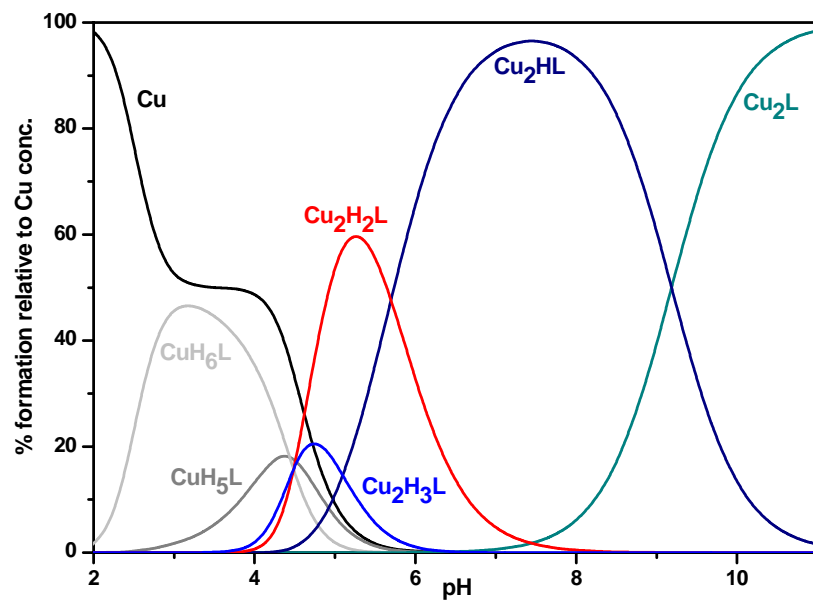

**Fig. S1.** Species distribution curves calculated for the  $\text{Cu}^{2+}/\text{H}_6\text{L}^1$  system in aqueous solution.  $C_{\text{Cu}} = 2 \times C_{\text{L}} = 2.0 \times 10^{-3} \text{ mol dm}^{-3}$ .  $L = L^1$ .

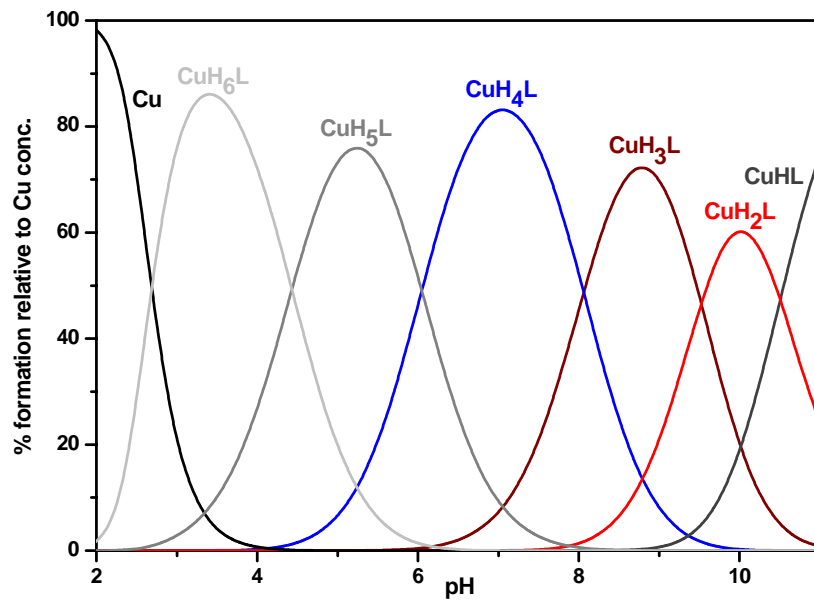

**Fig. S2.** Species distribution curves calculated for the  $\text{Cu}^{2+}/\text{H}_6\text{L}^1$  system in aqueous solution.  $C_{\text{Cu}} = C_{\text{L}} = 1.0 \times 10^{-3} \text{ mol dm}^{-3}$ .  $L = L^1$ .

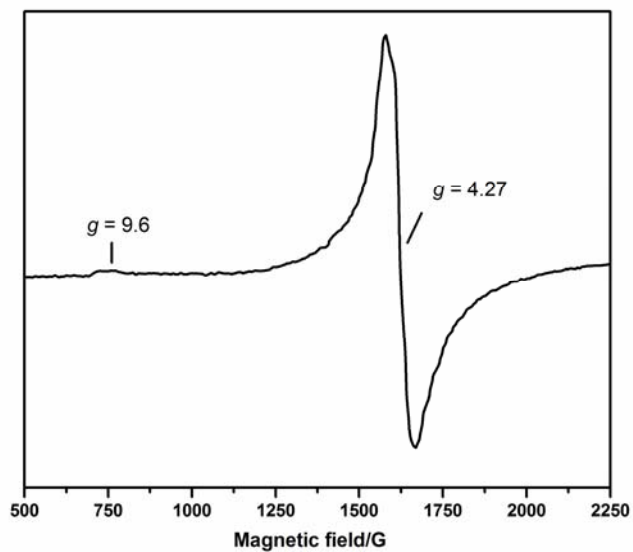

**Fig. S3.** X-band EPR signal of the  $\text{Fe}^{3+}/\text{H}_6\text{L}^1$  1:1 ratio solution at pH 10.2, recorded in water/DMSO (1:1 v/v), at 4.7 K. Microwave power of 2.35 mW, modulation amplitude of 1 mT and frequency of 9.64 GHz.
